# Supplementary material
Source: ML conference proceedings conference paper supplement (https://openaccess.thecvf.com/content/ICCV2025/html/Garcia-Fernandez_Superpowering_Open-Vocabulary_Object_ICCV_2025_paper.html)
Supplement: Supplementary file 1 [file Garcia-Fernandez_Superpowering_Open-Vocabulary_Object_ICCV_2025_supplemental.pdf]

# Superpowering Open-Vocabulary Object Detectors for X-ray Vision

## Supplementary Material

This supplementary material is organized into the following sections: Supp. A outlines ethical considerations related to our work; Supp. B provides the reproducibility statement; Supp. C describes the main characteristics and construction process of our proposed dataset, DET-COMPASS; Supp. D presents additional technical implementation details of RAXO; Supp. E and Supp. F offer further analyses of RAXO’s effectiveness; and Supp. G and Supp. H present insights into its performance through qualitative examples.

### A. Ethics Statement

We do not anticipate any immediate negative societal impact from our work. However, we encourage future researchers building upon this study to exercise the same level of caution we have maintained, recognizing that RAXO has the potential to be applied for both beneficial and harmful purposes.

The primary motivation behind our research is to enhance open-world perception in X-ray prohibited object detection, addressing the growing diversity of objects in security screening. By improving detection capabilities, our work aims to strengthen public safety in critical security scenarios. Notably, the proposed pipeline and model can be executed entirely on local systems, ensuring that user or institutional privacy remains well protected.

For evaluation, we rely on publicly available, well-established benchmarks, strictly adhering to their licensing terms. Regarding the new DET-COMPASS benchmark introduced in this work, we source images from the publicly available COMPASS-XP [9] X-ray classification dataset, complying fully with its license. Our contribution lies in providing additional bounding box annotations to COMPASS-XP through our human annotation efforts. Importantly, we do not introduce or collect any new images. The human annotation process for DET-COMPASS was conducted following the approval of our institution’s ethics board after a thorough committee review.

Lastly, for web-retrieved images, we only retain those explicitly permitted for non-commercial use in this project. Each retrieved image was manually reviewed, ensuring that none contain private information such as human faces or vehicle license plates. We will release our proposed benchmark and prototypes under an appropriate license.

### B. Reproducibility Statement

Upon publication, we will make all necessary resources available to facilitate the full reproduction of our experimental results. This includes the source code, precise prompts, and benchmark datasets with their splits. Our proposed framework, RAXO, is developed using *open-source*,

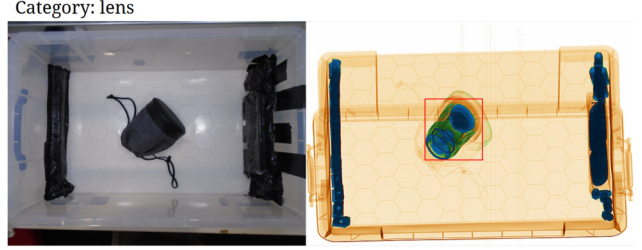

Figure 6. **Occluded RGB object.** In this pair of images, the object `lens` is completely occluded in the RGB image, preventing the annotation of a bounding box

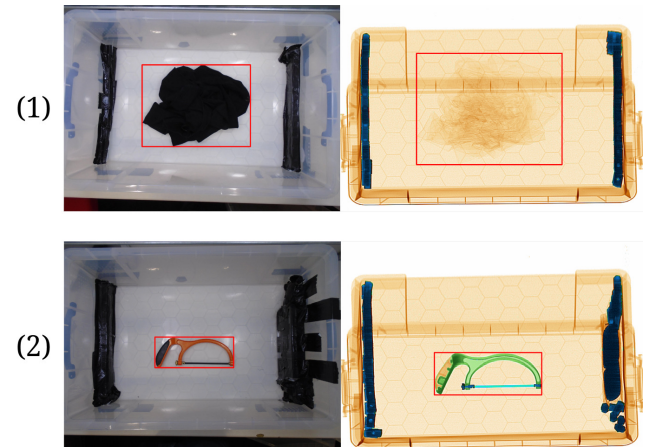

Figure 7. **Visibility attribute.** In (1), the cardigan does not have a discernible signature in the X-ray spectrum, thus `visible=False`. In (2), the hacksaw does, so `visible=True`.

*publicly accessible* models and data, reinforcing its reproducibility. A comprehensive breakdown of our pipeline’s construction is provided in Sec. 5. Additionally, our supplementary material offers further implementation specifics, including the exact prompts, to assist practitioners in replicating our approach effortlessly. By offering detailed methodological explanations, extensive experimental results, and a fully open-source framework and data, we aim to ensure that our work is easily reproducible, empowering researchers and practitioners to adapt our method across diverse applications.

### C. DET-COMPASS Details

To construct our new DET-COMPASS dataset, we sourced images from the publicly available COMPASS-XP [9] dataset. Both the images and their metadata are licensed under the Creative Commons Attribution 4.0 International

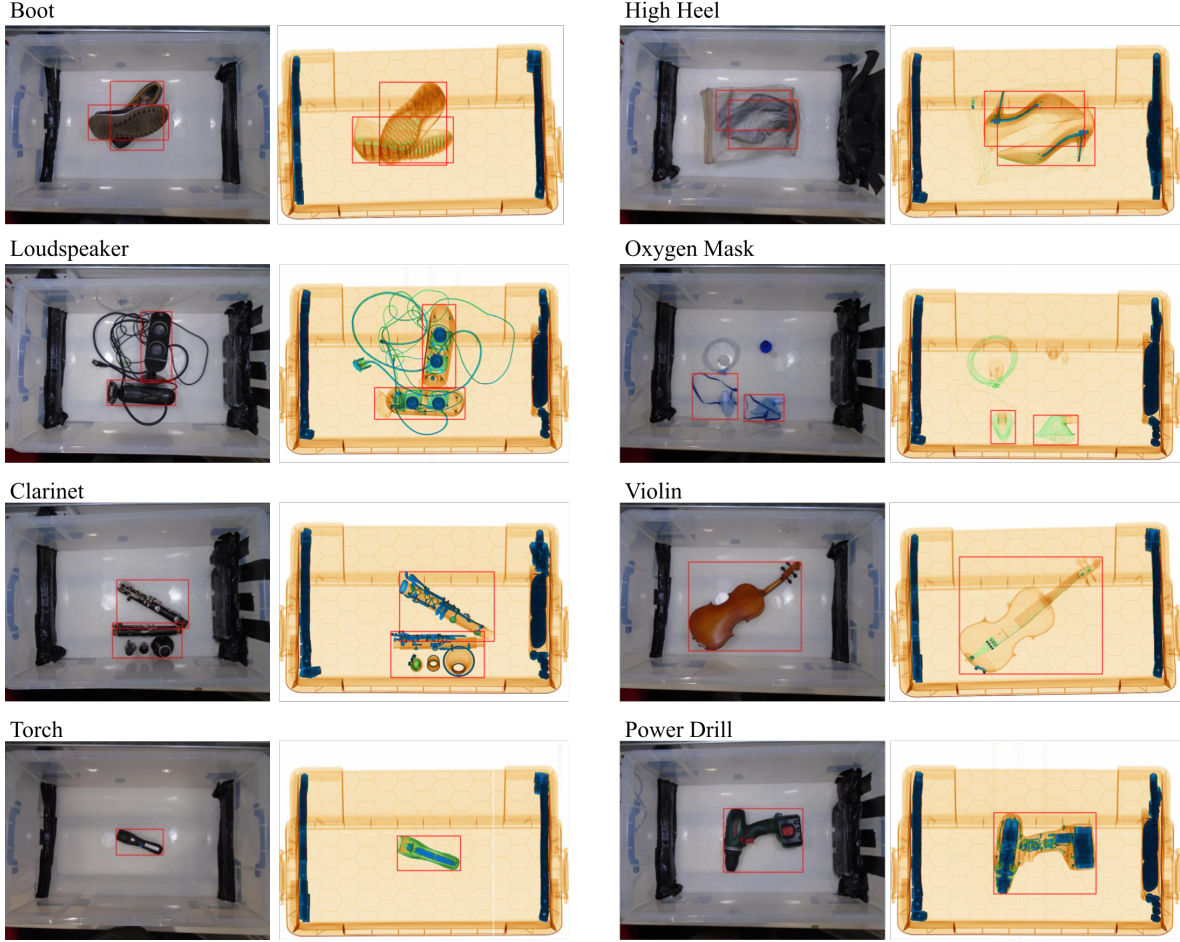

Figure 8. Examples from our **DET-COMPASS dataset**, showing RGB-X-ray pairs with annotated bounding boxes.

License, permitting unrestricted use for research and commercial applications. COMPASS-XP comprises 1,928 image pairs, each consisting of an X-ray image captured with a Gilardoni FEP ME 536 scanner and a corresponding natural image taken with a Sony DSC-W800 digital camera. A key limitation of COMPASS-XP is that it provides only classification labels and the (RGB X-ray) pairs are not spatially aligned.

Our DET-COMPASS dataset builds upon COMPASS-XP by extending the annotations with manually labeled bounding boxes (Fig. 8). The annotation process was conducted by hiring three experts, each responsible for labeling 50% of the RGB-X-ray pairs. To ensure accurate alignment between the RGB and X-ray images, each expert annotated both modalities simultaneously. After completing their respective sets, all three experts reviewed the annotations collectively. One of them acted as a middle ground, overseeing the review process and resolving any remaining discrepancies to ensure annotation consistency.

In total, DET-COMPASS comprises 3,856 annotated im-

ages, including 1,928 X-ray and 1,928 RGB images. The average annotation time per image, regardless of modality, was 20 seconds. Given that each expert annotated half of the dataset, the total annotation time amounted to 32.13 hours. The review process required an additional 3 seconds per image, and since all experts participated in reviewing the entire dataset, the total review time was 9.64 hours.

The total number of annotated objects (bounding boxes) in the X-ray images is 1,907, while in the RGB images, it is 1,870. This discrepancy arises because some objects are occluded in the RGB modality, making their localization impossible (Fig. 6). Each annotated object in the X-ray modality includes a *visibility* attribute, indicating whether it produces a discernible signature in the X-ray spectrum. An example of an object marked as visible is shown in Fig. 7(2), while an example of an object marked as non-visible is presented in Fig. 7(1). DET-COMPASS comprises a total of 370 object classes (detailed in Tab. 11), of which 307 contain at least one annotated visible object.

Finally, DET-COMPASS avoids long-tail distribution is-

sues thanks to its uniformly distributed categories, with a low Gini coefficient of  $G = 0.26$  (e.g., MS-COCO has  $G = 0.57$ , where higher  $G$  indicates bigger long-tail bias).

## D. Further Implementation Details of RAXO

### D.1. Pseudo-code of RAXO

In Algorithm 1, we present the pseudocode for the core implementation of RAXO, detailing both the construction of visual descriptors and their use to classify detector proposals.

### D.2. Material-Transfer Mechanism

To construct the material database  $\mathcal{M}$ , we cluster  $\mathcal{C}^{\text{in-house}}$  into groups of materials identified by a large language model (LLM). The average appearance of objects within each group is used as an estimator of the corresponding material. To perform this clustering, we utilize GPT-4 with the prompt specified in Tab. 12(1).

Once the material database is computed, it can be used to adapt RGB objects to the X-ray modality by inpainting them with their expected material. These expected materials are retrieved from  $\mathcal{M}$  using an LLM with the prompt provided in Tab. 12(2).

**Material database construction when  $\mathcal{D}_{\text{XRAY}}^{\text{in-house}} = \emptyset$ .** When no samples are available from  $\mathcal{D}_{\text{XRAY}}^{\text{in-house}}$ , we construct our material database using the standardized color scheme of security X-ray scans. These scans operate by irradiating objects with X-rays and rendering them in pseudo-colors based on their spectral absorption rates. Typically, three primary pseudo-colors are used [1, 33]: **orange** for organic substances (e.g., food, explosives), **green** for inorganic materials (e.g., laptops, smartphones), and **blue** for metals (e.g., knives, guns). We leverage this modality knowledge to build our material database around these three broad materials.

### D.3. Web-retrieval Details

To retrieve images from the web, we utilize the Google Custom Search API [8], configuring specific query parameters to refine the results. We set the search type to images (searchType: image) and restrict the results to photos (imgType: photo) in common JPEG and PNG formats (fileType: jpg|png). To ensure relevance, we limit searches to English-language sources (lr: lang\_en) and prioritize images from the past seven years (dateRestrict: y7).

### D.4. In-domain Descriptor Details

In-domain descriptors from  $\mathcal{D}_{\text{XRAY}}^{\text{in-house}}$  are built offline by combining the training sets from the six evaluation datasets (PIXray [19], PIDray [34], CLCXray [42], DvXray [20],

---

### Algorithm 1: Pseudo-code of RAXO.

---

**Input:** vocabulary  $\mathcal{C}^{\text{test}}$ ; OvOD detector  $\mathcal{F}$ ; test image  $\mathbf{I}$ ;  
in-house database  $\mathcal{D}_{\text{XRAY}}^{\text{in-house}}$ ; web-database  $\mathcal{D}_{\text{RGB}}^{\text{web}}$   
**Output:** Detections  $\mathcal{T}$  of image  $\mathbf{I}$

```

1 Initialization:  $\mathcal{T} \leftarrow \emptyset$ 
2 Initialization:  $\mathcal{X} \leftarrow \emptyset$ 
3 Initialization:  $\mathcal{X}_{bg} \leftarrow \emptyset$ 
4  $\mathcal{M} = \text{CreateMaterialDatabase}(\mathcal{D}_{\text{XRAY}}^{\text{in-house}})$ 
   /* Visual class descriptors construction */
5 for class  $c \in \mathcal{C}^{\text{test}}$  do
   /* VSA refers to the Visual samples acquisition pipeline */
6    $\mathcal{G}_c^{\text{XRAY}} \leftarrow \text{VSA}(c, \mathcal{D}_{\text{XRAY}}^{\text{in-house}})$ 
7   if  $\mathcal{G}_c^{\text{XRAY}}$  is  $\emptyset$  then
8      $\tilde{\mathcal{G}}_c^{\text{web}} \leftarrow \text{VSA}(c, \mathcal{D}_{\text{RGB}}^{\text{web}})$ 
9      $\mathcal{G}_c^{\text{web}} = \text{Filter}(\tilde{\mathcal{G}}_c^{\text{web}}, \mathcal{F}, c, \tau)$ 
10     $\mathcal{A}_m^c = \text{GetMaterialAppearance}(\mathcal{M}, c)$ 
11    for sample  $\mathbf{u} \in \mathcal{G}_c^{\text{web}}$  do
12      /*  $\Omega$  denotes segmentation */
13       $\tilde{\mathbf{u}} = \Omega(\mathbf{u}) \odot (\mathcal{A}_m^c \cdot \mathbf{1})$ 
14       $\mathcal{G}_c^{\text{XRAY}} \leftarrow \mathcal{G}_c^{\text{XRAY}} \cup \{\tilde{\mathbf{u}}\}$ 
15    end
16  end
   /* Visual class modeling */
17   $\mathcal{X}_c \leftarrow \emptyset$ 
18  for sample  $\mathbf{I} \in \mathcal{G}_c^{\text{XRAY}}$  do
19     $\mathbf{x}_I^{\text{pos}} = \text{Eq. (3)}$ 
20     $\mathbf{x}_I^{\text{neg}} = \text{Eq. (4)}$ 
21     $\mathcal{X}_c \leftarrow \mathcal{X}_c \cup \{\mathbf{x}_I^{\text{pos}}\}$ 
22     $\mathcal{X}_{bg} \leftarrow \mathcal{X}_{bg} \cup \{\mathbf{x}_I^{\text{neg}}\}$ 
23  end
24   $\mathcal{X}_c \leftarrow \mathcal{X}_c \cup \{\text{Avg}(\mathcal{X}_c)\}$ 
25   $\mathcal{X} \leftarrow \mathcal{X} \cup \mathcal{X}_c$ 
26 end
   /* Detection on image  $\mathbf{I}$  */
27  $z = \mathcal{F} | \Phi_{RPN}(\mathbf{I})$ 
28  $\mathcal{C}^{\text{test}'} \leftarrow \mathcal{C}^{\text{test}} \cup \{\text{background}\}$ 
29 for proposal  $\mathbf{z}_m \in z$  do
30    $\hat{c}_m \leftarrow \arg \max_{c \in \mathcal{C}^{\text{test}'}} \max_{\mathbf{x}_c^i \in \mathcal{X}_c} \langle \mathbf{z}_m, \mathbf{x}_c^i \rangle$ 
31    $\hat{\mathbf{b}}_m \leftarrow \mathcal{F} | \Phi_{REG}(\mathbf{z}_m)$ 
   /* DCC refers to the Descriptor Consistency Criterion */
32   if  $\hat{c}_m$  is not background and  $\text{DCC}(\mathbf{z}_m, \mathcal{X})$  then
33      $\mathcal{T} \leftarrow \{\hat{c}_m \cup \hat{\mathbf{b}}_m\}$ 
34   end
35 end
36 Return:  $\mathcal{T}$ 

```

---

HiXray [30], and DET-COMPASS) and removing overlapping categories. Combining the datasets ensures a fair evaluation through dataset-agnostic prototypes that capture generic concepts, rather than dataset-specific representations.



## D.5. Dataset Colorization

We do not perform color adjustments across datasets, as most do not provide raw density values. However, this does not adversely affect RAXO, since the colorization strategies follow manufacturer-specific yet *consistent palettes* that use similar colors to represent the same materials. These mappings, while differing slightly in hue or intensity, consistently represent the material-specific density and spatial structure necessary for robust detection. Notably, our DET-COMPASS also includes raw density values, enabling more flexible experimentation in future work.

## D.6. Complexity Analysis

RAXO is designed to adapt *off-the-shelf* RGB OvOD methods to X-ray without training, making it inherently *modular*. Importantly, most of its components run *offline only once* to build the visual descriptors, requiring roughly 0.7s per class on an NVIDIA A100 GPU. At inference, RAXO simply replaces the text-based classifier of the base OvOD detector with its visual-based classifier, introducing negligible overhead (e.g., 3ms/sample on G-DINO) with complexity  $O(n)$  w.r.t. the number of categories.

## E. Extended Experimental Results

Maintaining the same experimental setup as in Sec. 6.1, we extend our main results to report AP, AP50, and AP75. Additionally, since the experiments are repeated three times with different random distributions of in-domain and web categories for the intermediate gallery settings, we also report the standard deviation. Tab. 8 show the results. The low standard deviations, combined with RAXO’s consistent improvement over all baselines, further validate the effectiveness of RAXO in adapting *off-the-shelf* open-vocabulary detectors to the X-ray modality.

To validate RAXO with an LLM-guided DETR, we also integrated it into LaMI-DETR [4], yielding consistent improvements across all settings (Tab. 9). Finally, to show that the large models in RAXO can be removed or replaced to achieve a desired balance between efficiency and precision, we present an additional ablation in Tab. 10.

## F. Per-class AP

Table 6 shows per-class AP on the PIXray dataset for G-DINO. RAXO consistently improves performance, especially on challenging categories with low baseline scores such as *Pressure Vessel* ( $\uparrow 52.3$ ), and *Hammer* ( $\uparrow 54.8$ ). In Tab. 7, we extend the per-category analysis to the DET-COMPASS dataset, analyzing the top-5 classes with the highest and lowest performance gains. RAXO excels on items with distinctive shapes or strong cross-modal color shifts, while struggling with generic-shaped objects that provide limited cues under X-ray.

| Category        | G-DINO | G-DINO+RAXO                  |
|-----------------|--------|------------------------------|
| Pressure Vessel | 0.5    | <b>52.8</b> $\uparrow 52.3$  |
| Bat             | 70.7   | 69.7 $\downarrow -1.0$       |
| Gun             | 31.3   | <b>53.6</b> $\uparrow 22.3$  |
| Scissors        | 29.6   | <b>44.3</b> $\uparrow 14.7$  |
| Razor Blade     | 0.9    | <b>18.1</b> $\uparrow 17.2$  |
| Pliers          | 12.4   | <b>43.5</b> $\uparrow 31.1$  |
| Dart            | 0.4    | <b>32.0</b> $\uparrow 31.6$  |
| Knife           | 6.2    | <b>10.3</b> $\uparrow 4.1$   |
| Fireworks       | 0.0    | <b>2.1</b> $\uparrow 2.1$    |
| Battery         | 5.9    | <b>47.7</b> $\uparrow 41.8$  |
| Saw Blade       | 3.2    | <b>23.9</b> $\uparrow 20.7$  |
| Hammer          | 1.3    | <b>56.1</b> $\uparrow 54.8$  |
| Screwdriver     | 1.0    | <b>19.9</b> $\uparrow 18.9$  |
| Wrench          | 28.2   | <b>52.3</b> $\uparrow 24.1$  |
| Lighter         | 2.0    | <b>26.8</b> $\uparrow 24.8$  |
| <b>Average</b>  | 12.9   | <b>36.9</b> $\uparrow +24.0$ |

Table 6. **Per-category AP comparison** on the PIXray [19] dataset for G-DINO [18]. RAXO significantly boosts performance across nearly all categories, particularly those with low G-DINO baseline scores.

|        | Binder                    | Milk carton               | Crayon                    | Hair gel                  | Crowbar                   | Can opener                  | Corkscrew                   | Strainer                    | High heel                   | Compact disc                |
|--------|---------------------------|---------------------------|---------------------------|---------------------------|---------------------------|-----------------------------|-----------------------------|-----------------------------|-----------------------------|-----------------------------|
| G-DINO | 0.0                       | 0.1                       | 0.1                       | 0.2                       | 3.0                       | 7.5                         | 1.0                         | 16.7                        | 14.3                        | 1.3                         |
| + RAXO | <b>0.7</b> $\uparrow 0.7$ | <b>1.3</b> $\uparrow 1.2$ | <b>1.3</b> $\uparrow 1.2$ | <b>2.6</b> $\uparrow 2.4$ | <b>4.2</b> $\uparrow 1.1$ | <b>88.9</b> $\uparrow 81.4$ | <b>90.1</b> $\uparrow 89.1$ | <b>98.2</b> $\uparrow 81.5$ | <b>98.9</b> $\uparrow 84.6$ | <b>99.1</b> $\uparrow 97.8$ |

Table 7. **Per-category AP on DET-COMPASS** for the top-5 classes with the highest and lowest performance gains. We report AP for G-DINO [18] and G-DINO+RAXO across categories.

## G. Qualitative Analysis of the Material Transfer Mechanism

The core challenge that RAXO faces is tackling the domain gap between RGB and X-ray images without training or fine-tuning. The specific component we develop for this purpose is our material-transfer mechanism, whose results compared to a diffusion-based method [7] can be found in Fig. 9.

## H. Qualitative Analysis of RAXO

Fig. 10 presents qualitative visualizations of detected X-ray objects before and after applying RAXO with GroundingDINO [18] on the PIXray [19] dataset. For proper visualization, we display detections with a confidence score higher than 0.15 in both cases. These images lead to two key conclusions: (1) RAXO significantly improves the classification of detected proposals. In the baseline images, many objects are correctly localized but misclassified. RAXO successfully corrects these misclassifications by constructing robust visual descriptors. (2) The use of both background descriptors and the Descriptor Consistency Criterion (DCC) effectively eliminates false positives that do not correspond to actual X-ray objects. These observations strongly support the reliability of RAXO.

| $\mathcal{G}$                                                                                            | Method       | PIXRAY   |          |          | PIDRAY   |          |          | CLCXray  |          |          | COMPASS-XP |          |          | HiXray   |          |          | DVXray   |          |          |
|----------------------------------------------------------------------------------------------------------|--------------|----------|----------|----------|----------|----------|----------|----------|----------|----------|------------|----------|----------|----------|----------|----------|----------|----------|----------|
|                                                                                                          |              | AP       | AP50     | AP75     | AP       | AP50     | AP75     | AP       | AP50     | AP75     | AP         | AP50     | AP75     | AP       | AP50     | AP75     | AP       | AP50     | AP75     |
| $\mathcal{D}_{\text{in-house}}^{\text{XRAY}}$<br>$\downarrow$<br>$\mathcal{D}_{\text{web}}^{\text{RGB}}$ | G-DINO [18]  | 12.9     | 14.9     | 13.4     | 10.9     | 13.6     | 11.7     | 6.7      | 8.4      | 7.1      | 13.4       | 14.2     | 13.9     | 7.0      | 10.8     | 8.2      | 10.0     | 11.2     | 10.4     |
|                                                                                                          | 100/0        | 36.9     | 45.0     | 39.0     | 16.5     | 21.4     | 17.9     | 22.2     | 29.6     | 24.4     | 47.9       | 54.2     | 48.8     | 17.1     | 27.2     | 19.4     | 22.6     | 26.6     | 24.1     |
|                                                                                                          | 80/20        | 33.8±0.6 | 40.9±0.9 | 35.5±0.6 | 15.4±0.4 | 19.8±0.6 | 16.6±0.4 | 18.0±2.1 | 23.7±2.3 | 19.5±2.2 | 41.0±2.2   | 46.2±2.4 | 41.7±2.2 | 14.5±0.6 | 23.5±1.0 | 16.3±0.6 | 21.0±0.6 | 24.8±0.9 | 22.3±0.6 |
|                                                                                                          | 50/50 + RAXO | 25.4±2.0 | 31.2±1.9 | 26.7±2.0 | 15.5±0.9 | 19.8±1.0 | 16.8±1.0 | 17.0±1.8 | 22.9±3.2 | 18.7±2.3 | 31.4±0.7   | 35.3±0.9 | 32.1±0.6 | 13.4±0.1 | 21.3±0.1 | 15.3±0.2 | 16.1±1.8 | 18.8±2.3 | 17.0±2.0 |
|                                                                                                          | 20/80        | 21.6±0.6 | 26.1±1.1 | 22.6±0.6 | 13.9±0.5 | 17.9±0.7 | 14.9±0.6 | 10.0±0.4 | 13.1±1.5 | 10.7±0.7 | 20.5±0.6   | 22.9±0.7 | 21.1±0.7 | 9.8±1.0  | 15.8±1.4 | 11.1±1.2 | 15.0±1.0 | 17.2±1.1 | 15.8±1.2 |
|                                                                                                          | 0/100        | 16.1     | 19.8     | 16.8     | 13.4     | 17.1     | 14.3     | 7.1      | 9.7      | 7.5      | 14.0       | 15.4     | 14.5     | 7.9      | 13.0     | 8.7      | 12.4     | 14.1     | 12.9     |
| $\mathcal{D}_{\text{in-house}}^{\text{XRAY}}$<br>$\downarrow$<br>$\mathcal{D}_{\text{web}}^{\text{RGB}}$ | Detic [44]   | 9.3      | 11.6     | 9.5      | 7.1      | 9.7      | 7.6      | 4.7      | 7.3      | 4.6      | 11.5       | 13.4     | 13.3     | 4.8      | 8.6      | 5.2      | 7.0      | 8.5      | 7.5      |
|                                                                                                          | 100/0        | 27.3     | 34.5     | 28.2     | 11.3     | 15.8     | 12.2     | 14.0     | 20.6     | 14.7     | 35.3       | 39.9     | 35.4     | 14.2     | 23.9     | 15.5     | 19.4     | 23.9     | 21.2     |
|                                                                                                          | 80/20        | 23.9±1.3 | 30.2±1.5 | 24.6±1.3 | 10.8±0.1 | 15.0±0.2 | 11.7±0.1 | 12.3±1.6 | 18.1±1.8 | 12.8±1.9 | 30.7±1.4   | 34.4±1.3 | 30.8±1.5 | 12.1±1.1 | 20.8±1.8 | 13.1±1.2 | 18.0±2.2 | 22.1±2.6 | 19.7±2.4 |
|                                                                                                          | 50/50 + RAXO | 19.5±1.6 | 24.8±1.9 | 20.1±1.7 | 10.3±0.3 | 14.3±0.3 | 11.0±0.3 | 9.2±1.2  | 13.5±2.3 | 9.5±1.2  | 24.4±2.7   | 27.1±2.7 | 24.8±2.6 | 11.0±0.9 | 18.9±1.3 | 11.9±1.2 | 14.6±1.1 | 17.9±1.2 | 15.9±1.2 |
|                                                                                                          | 20/80        | 15.2±0.9 | 19.4±0.9 | 15.5±1.0 | 9.6±0.1  | 13.3±0.2 | 10.3±0.2 | 8.0±0.1  | 12.5±0.1 | 8.0      | 16.4±1.0   | 18.3±1.0 | 16.4±1.0 | 9.9±0.8  | 16.8±1.4 | 10.7±0.9 | 12.7±0.6 | 15.5±0.8 | 13.9±0.7 |
|                                                                                                          | 0/100        | 13.4     | 16.8     | 13.6     | 9.1      | 12.6     | 9.8      | 5.2      | 8.1      | 5.1      | 11.9       | 13.1     | 12.1     | 7.9      | 13.8     | 8.4      | 9.4      | 11.4     | 10.1     |
| $\mathcal{D}_{\text{in-house}}^{\text{XRAY}}$<br>$\downarrow$<br>$\mathcal{D}_{\text{web}}^{\text{RGB}}$ | CoDet [21]   | 7.3      | 8.7      | 7.6      | 5.7      | 7.6      | 6.2      | 3.1      | 5.7      | 2.7      | 8.4        | 8.9      | 8.7      | 3.4      | 5.9      | 3.7      | 5.6      | 6.8      | 6.0      |
|                                                                                                          | 100/0        | 27.9     | 33.6     | 29.2     | 10.3     | 14.6     | 10.9     | 14.8     | 22.4     | 15.9     | 35.8       | 41.0     | 36.7     | 13.2     | 22.0     | 14.8     | 17.6     | 21.7     | 19.0     |
|                                                                                                          | 80/20        | 25.1±1.5 | 30.2±1.7 | 26.2±1.7 | 9.5±0.3  | 13.4±0.5 | 10.1±0.3 | 12.0±1.9 | 18.3±2.8 | 12.7±2.1 | 32.2±0.9   | 36.5±1.5 | 33.1±0.6 | 11.7±1.3 | 19.4±2.2 | 13.2±1.5 | 15.4±1.4 | 18.8±1.7 | 16.7±1.6 |
|                                                                                                          | 50/50 + RAXO | 20.0±0.7 | 24.1±0.9 | 20.8±0.7 | 9.5±0.5  | 13.4±0.7 | 10.1±0.5 | 9.2±1.4  | 14.2±2.1 | 9.6±1.7  | 24.0±0.2   | 26.7±0.3 | 24.7±0.2 | 9.9±0.4  | 16.7±0.8 | 11.1±0.4 | 11.5±0.8 | 14.2±1.1 | 12.4±0.8 |
|                                                                                                          | 20/80        | 14.8±2.4 | 17.8±2.8 | 15.3±2.5 | 8.5±0.3  | 11.9±0.4 | 9.0±0.4  | 5.1±1.4  | 9.0±2.5  | 5.0±1.6  | 17.8±0.7   | 19.4±0.9 | 18.2±0.6 | 8.1±0.6  | 13.8±1.0 | 8.8±0.6  | 9.4±1.5  | 11.3±1.8 | 10.1±1.6 |
|                                                                                                          | 0/100        | 11.5     | 14.0     | 11.9     | 8.1      | 11.3     | 8.7      | 4.0      | 7.1      | 3.8      | 12.2       | 13.0     | 12.6     | 6.5      | 11.2     | 7.1      | 6.9      | 8.3      | 7.5      |
| $\mathcal{D}_{\text{in-house}}^{\text{XRAY}}$<br>$\downarrow$<br>$\mathcal{D}_{\text{web}}^{\text{RGB}}$ | VLDet [15]   | 9.8      | 12.1     | 10.3     | 6.9      | 9.4      | 7.4      | 4.4      | 7.8      | 4.0      | 10.6       | 11.4     | 10.8     | 5.1      | 9.0      | 5.5      | 7.4      | 9.2      | 8.1      |
|                                                                                                          | 100/0        | 32.3     | 40.1     | 34.0     | 11.7     | 16.8     | 12.6     | 15.4     | 23.3     | 15.9     | 36.4       | 41.4     | 37.2     | 14.8     | 24.5     | 16.3     | 20.1     | 25.1     | 22.0     |
|                                                                                                          | 80/20        | 29.2±1.2 | 36.3±1.2 | 30.7±1.3 | 11.0±0.3 | 15.7±0.3 | 11.7±0.3 | 12.7±0.5 | 19.6±1.2 | 13.0±0.5 | 31.8±0.8   | 36.0±1.0 | 32.5±0.9 | 13.1±1.2 | 21.8±1.9 | 14.3±1.3 | 16.8±0.2 | 21.0±0.1 | 18.4±0.1 |
|                                                                                                          | 50/50 + RAXO | 24.0±1.5 | 29.9±1.7 | 25.2±1.5 | 10.4±0.7 | 14.6±1.0 | 11.1±0.8 | 11.1±1.1 | 16.9±0.4 | 11.5±1.7 | 23.7±0.9   | 26.5±0.8 | 24.3±1.1 | 11.2±1.5 | 19.0±2.1 | 12.1±1.9 | 12.1±0.5 | 15.0±0.4 | 13.2±0.4 |
|                                                                                                          | 20/80        | 21.6±1.0 | 26.8±0.9 | 22.6±1.0 | 9.4±0.3  | 13.3±0.4 | 10.1±0.3 | 5.2±0.1  | 9.1±0.2  | 4.8±0.0  | 16.2±0.9   | 18.2±1.2 | 16.6±1.0 | 9.3±0.2  | 15.9±0.2 | 9.9±0.3  | 10.6±0.5 | 13.1±0.6 | 11.5±0.5 |
|                                                                                                          | 0/100        | 14.1     | 17.8     | 14.5     | 8.9      | 12.5     | 9.5      | 4.4      | 8.1      | 3.9      | 11.1       | 12.2     | 11.4     | 8.3      | 14.5     | 8.7      | 9.0      | 11.0     | 9.8      |

Table 8. **X-ray OvOD performance under the Cross-Modality Transfer Evaluation (CMTE) setting** on DET-COMPASS (ours), PIXray [19], PIDray [34], CLCXray [42], DvXray [20], and HiXray [30] datasets. We integrate RAXO into different baselines using different gallery  $\mathcal{G}$  compositions, from using only  $\mathcal{D}_{\text{in-house}}^{\text{XRAY}}$  data (100/0) to exclusively  $\mathcal{D}_{\text{web}}^{\text{RGB}}$  samples (0/100). RAXO consistently improves the performance of all baseline OvOD detectors across every dataset. We report the AP, AP50 and AP75. We also include the deviations because each experiment is repeated three times with different random distributions of in-domain and web categories for the intermediate gallery settings.

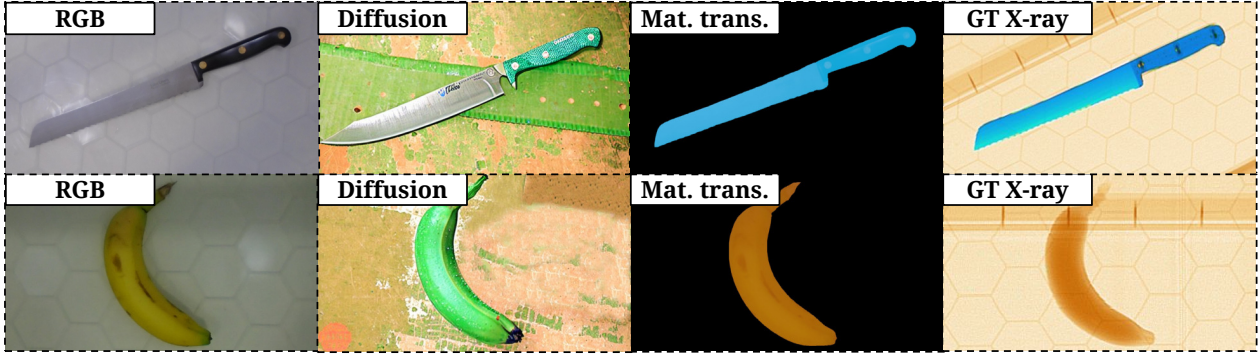

Figure 9. **Qualitative comparison** between our material-transfer mechanism and a diffusion-based method [7].

| $\mathcal{G}$                                                                                 | Method       | D-COMP.               | PIXray                | PIDray               | CLCXray               | DvXray               | HiXray              |
|-----------------------------------------------------------------------------------------------|--------------|-----------------------|-----------------------|----------------------|-----------------------|----------------------|---------------------|
| LaMI-DETR                                                                                     |              | 11.3                  | 13.6                  | 8.0                  | 4.0                   | 9.7                  | 6.3                 |
| $\mathcal{D}_{\text{in-house}}^{\text{XRAY}}$<br>↓<br>$\mathcal{D}_{\text{web}}^{\text{RGB}}$ | 100/0        | 31.9 <sup>↑20.6</sup> | 25.7 <sup>↑12.1</sup> | 13.1 <sup>↑5.1</sup> | 18.7 <sup>↑14.7</sup> | 18.1 <sup>↑8.4</sup> | 9.7 <sup>↑3.4</sup> |
|                                                                                               | 80/20        | 27.2 <sup>↑15.9</sup> | 23.2 <sup>↑9.6</sup>  | 12.0 <sup>↑4.0</sup> | 16.2 <sup>↑12.2</sup> | 16.0 <sup>↑6.3</sup> | 8.3 <sup>↑2.0</sup> |
|                                                                                               | 50/50 + RAXO | 22.0 <sup>↑10.7</sup> | 15.9 <sup>↑2.3</sup>  | 12.1 <sup>↑4.1</sup> | 15.1 <sup>↑11.1</sup> | 12.8 <sup>↑3.1</sup> | 7.6 <sup>↑1.3</sup> |
|                                                                                               | 20/80        | 15.7 <sup>↑4.4</sup>  | 15.2 <sup>↑1.6</sup>  | 10.8 <sup>↑2.8</sup> | 6.8 <sup>↑2.8</sup>   | 11.9 <sup>↑2.2</sup> | 7.0 <sup>↑0.7</sup> |
|                                                                                               | 0/100        | 11.5 <sup>↑0.2</sup>  | 14.8 <sup>↑1.2</sup>  | 10.8 <sup>↑2.8</sup> | 6.2 <sup>↑2.2</sup>   | 10.5 <sup>↑0.8</sup> | 6.5 <sup>↑0.2</sup> |

Table 9. **X-ray OvOD performance under the Cross-Modality Transfer Evaluation (CMTE) setting** on DET-COMPASS (ours), PIXray [19], PIDray [34], CLCXray [42], DvXray [20], and HiXray [30] datasets. We integrate RAXO into LaMI-DETR [4] using different gallery  $\mathcal{G}$  compositions, from using only  $\mathcal{D}_{\text{in-house}}^{\text{XRAY}}$  data (100/0) to exclusively  $\mathcal{D}_{\text{web}}^{\text{RGB}}$  samples (0/100). RAXO consistently improves the performance of LaMI-DETR.

|                       |       |         |        | PIXray (50/50)        |                       |                       |
|-----------------------|-------|---------|--------|-----------------------|-----------------------|-----------------------|
|                       |       |         |        | AP                    | AP50                  | AP75                  |
| Segment. LLM Features |       |         |        | AP                    | AP50                  | AP75                  |
| G-DINO [18]           |       |         |        | 12.9                  | 14.9                  | 13.4                  |
| + RAXO                | SAM 2 | GPT-4   | DINOv2 | 25.4 <sup>↑12.5</sup> | 31.2 <sup>↑16.3</sup> | 26.7 <sup>↑13.3</sup> |
|                       | -     | GPT-4   | DINOv2 | 22.0 <sup>↑9.1</sup>  | 27.3 <sup>↑12.4</sup> | 22.7 <sup>↑9.3</sup>  |
|                       | SAM 2 | -       | DINOv2 | 20.8 <sup>↑7.9</sup>  | 24.1 <sup>↑9.2</sup>  | 21.4 <sup>↑8.0</sup>  |
|                       | SAM 2 | GPT-4   | DINO   | 22.2 <sup>↑9.3</sup>  | 27.6 <sup>↑12.7</sup> | 22.9 <sup>↑9.5</sup>  |
|                       | SAM 2 | LLaMA-3 | DINOv2 | 24.7 <sup>↑11.8</sup> | 30.1 <sup>↑15.2</sup> | 26.1 <sup>↑12.7</sup> |
|                       | SAM   | GPT-4   | DINOv2 | 25.1 <sup>↑12.2</sup> | 31.0 <sup>↑16.1</sup> | 26.4 <sup>↑13.0</sup> |

Table 10. **Ablation study of RAXO components on the PIXray [19] dataset (50/50 setting).** We integrate RAXO into G-DINO and analyze the impact of segmentation models, language models, and visual features. Results show that each component incrementally boosts performance, with the full RAXO configuration yielding the best results.

| DET-COMPASS Categories |                    |                     |                |                  |                |                  |
|------------------------|--------------------|---------------------|----------------|------------------|----------------|------------------|
| abacus                 | abaya              | amplifier           | analog watch   | apron            | baby monitor   | backpack         |
| bag of sweets          | baking dish        | ballpoint           | banana         | Band Aid         | baseball bat   | baseball cap     |
| bath towel             | bathing cap        | beanie              | beer bottle    | beer glass       | bell pepper    | belt             |
| bib                    | bicycle helmet     | bikini              | binder         | binoculars       | bird feeder    | biscuits         |
| blowtorch              | boardgame          | book                | book jacket    | boot             | bow tie        | bowl             |
| bowler hat             | box cutter         | bracelet            | brassiere      | bread knife      | brush          | bumbag           |
| butternut squash       | cable              | caliper             | camcorder      | camera           | can opener     | candle           |
| canned food            | capo               | cardigan            | cards          | carving knife    | cassette       | cassette player  |
| cd drive               | cellular telephone | cereal              | chain          | charger          | chewing gum    | chisel           |
| chocolate              | chocolate sauce    | Christmas stocking  | cigarettes     | clarinet         | coat hanger    | cocktail shaker  |
| coffee mug             | coffeepot          | colander            | comb           | combination lock | comic book     | compact disc     |
| condoms                | corkscrew          | cotton buds         | cotton wool    | cowboy hat       | craft knife    | crayon           |
| crisps                 | crossword puzzle   | crowbar             | cucumber       | dagger           | denture        | deodorant        |
| diaper                 | digital watch      | dinner jacket       | dishrag        | dressing gown    | dvd player     | e cigarette      |
| e liquid               | electric fan       | electric toothbrush | empty          | envelope         | espresso maker | extension cord   |
| face powder            | fascinator         | feather boa         | first aid kit  | floss            | flute          | fork             |
| French loaf            | frisbee            | frying pan          | fur coat       | gaffer tape      | game console   | gameboy          |
| gas canister           | glove              | glue gun            | goggles        | hacksaw          | hair clippers  | hair gel         |
| hair spray             | hairbrush          | hammer              | hand blower    | handkerchief     | hard disc      | harmonica        |
| hatchet                | headphones         | hearing aid         | high heel      | hook             | hourglass      | ipad             |
| iPod                   | iron               | jean                | jersey         | jewellery box    | jigsaw puzzle  | joystick         |
| jumper                 | kettle             | keys                | kimono         | kindle           | kiwi           | knee pad         |
| knife                  | lab coat           | ladle               | lampshade      | laptop           | laser pointer  | leather jacket   |
| lemon                  | lens               | lens cap            | letter opener  | lighter          | lime           | lipstick         |
| lotion                 | loudspeaker        | loupe               | magazine       | magnetic compass | maillot        | mallet           |
| marker                 | mask               | matchstick          | measuring cup  | microphone       | milk can       | milk carton      |
| mitten                 | mixing bowl        | modem               | mortar         | mosquito net     | mouse          | mousetrap        |
| mouthwash              | multimeter         | music stand         | nail           | nail clippers    | nail file      | nail scissors    |
| necklace               | notebook           | orange              | oxygen mask    | padlock          | paint can      | paintbrush       |
| pajama                 | paper towel        | passport            | pasta          | pencil           | pencil box     | pencil sharpener |
| penknife               | pepper grinder     | perfume             | pick           | pickaxe          | piggy bank     | pill bottle      |
| pillow                 | plane              | plastic bag         | plate          | plate rack       | pliers         | plunger          |
| Polaroid camera        | polo shirt         | pomegranate         | poncho         | pop bottle       | pot            | power drill      |
| power socket           | power supply       | prayer rug          | quill          | quilt            | quilted jacket | radio            |
| rasp                   | razor              | razor blades        | recorder       | red wine         | reflex camera  | remote control   |
| rice                   | roll of sweets     | roller skate        | roller eraser  | rubber gloves    | rubik cube     | rugby ball       |
| rugby shirt            | rule               | running shoe        | safety pin     | salad bowl       | saltshaker     | sandal           |
| sandwich               | sarong             | saucepan            | saw            | sax              | scale          | scarf            |
| scissors               | screw              | screwdriver         | secateurs      | sellotape        | sewing machine | shampoo          |
| shaver                 | shawl              | shirt               | shorts         | shovel           | shower cap     | sieve            |
| ski mask               | skipping rope      | sleeping bag        | slide          | slotted spoon    | smartphone     | snorkel          |
| soap                   | soap dispenser     | sock                | solder         | soldering iron   | sombrero       | soup bowl        |
| spatula                | spectacles         | spirit level        | splitter block | spoon            | spotlight      | staple gun       |
| stapler                | stethoscope        | stockings           | stole          | stopwatch        | strainer       | strings          |
| stylophone             | suit               | sunglasses          | sunscreen      | swab             | sweatshirt     | swimming trunks  |
| switch                 | syringe            | table lamp          | tampon         | tape measure     | tea towel      | teapot           |
| teaspoon               | teddy              | telephone           | telescope      | tennis ball      | thermals       | thermometer      |
| thermos                | tin of sweets      | toaster             | toilet tissue  | toner cartridge  | toothbrush     | toothpaste       |
| top hat                | torch              | tracksuit           | tray           | tripod           | tuner          | ukulele          |
| umbrella               | underpants         | vacuum              | vase           | velvet           | vinyl record   | violin           |
| waffle iron            | walking boot       | wall clock          | wallet         | washbag          | water bottle   | water jug        |
| wellington boot        | wet wipes          | whetstone           | whistle        | wig              | wineglass      | wire wool        |
| wirecutter             | wok                | wooden spoon        | wool           | wrench           | wrist guard    |                  |

Table 11. Category names of DET-COMPASS.

(1): Material-database clustering prompt

“You are a computer expert specializing in material classification. Your task is to analyze a given list of objects, determine their primary material composition, and group them accordingly.

Instructions:

Identify the main materials present among the objects (e.g., metal, organic, inorganic, plastic, ceramic, etc.). Assign each object to the most appropriate material category. Each object should belong to only one category based on its primary composition. Return the results in JSON format, where the keys are material categories, and the values are lists of objects belonging to those categories.

Example:

Input: Objects: gun, bat, pressure vessel, beer glass, fur coat, lemon

Expected Output (JSON):

metal: [gun, bat],

inorganic: [pressure vessel, beer glass],

organic: [fur coat, lemon]

Now, classify the following list of objects:  $\{D^{\text{in-house}}\}$ . Return only the json format.”

(2): Object material identification prompt

“You are a computer vision assistant. Given a  $\{object\}$ , classify it into one of the following materials:  $\{M.materials\_names\}$ . Return only the material. You must always select one.”

Table 12. **Prompts used for material clustering and retrieval.** (1) The clustering prompt provided to GPT-4 to group  $C^{\text{in-house}}$  into material categories. (2) The retrieval prompt used to query  $M$  and infer the expected material of unknown RGB objects.

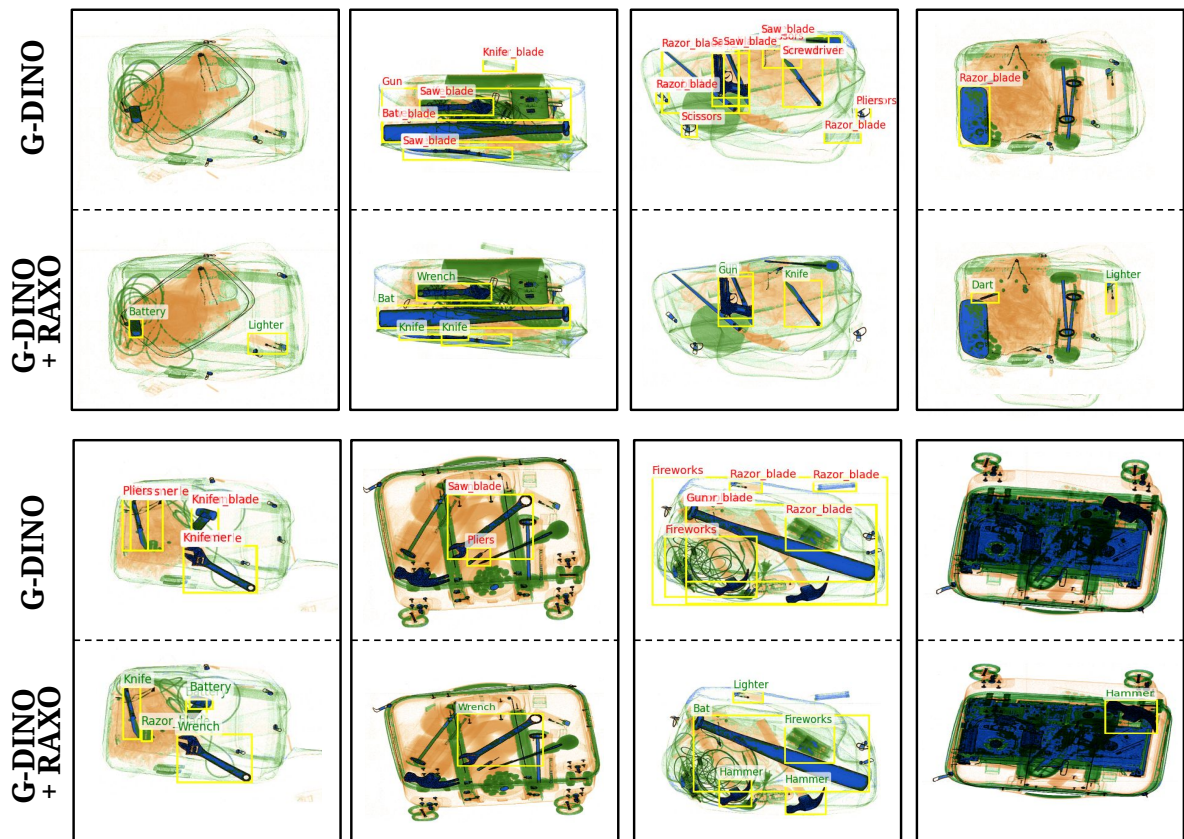

Figure 10. **Qualitative comparison** of G-DINO [18] and G-DINO+RAXO.



## References

- [1] Samet Akcay and Toby Breckon. Towards automatic threat detection: A survey of advances of deep learning within x-ray security imaging. *Pattern Recognition*, 122:108245, 2022. 2, 3
- [2] An Chang, Yu Zhang, Shunli Zhang, Leisheng Zhong, and Li Zhang. Detecting prohibited objects with physical size constraint from cluttered x-ray baggage images. *Knowledge-Based Systems*, 2022. 1
- [3] Alexey Dosovitskiy, Lucas Beyer, Alexander Kolesnikov, Dirk Weissenborn, Xiaohua Zhai, Thomas Unterthiner, Mostafa Dehghani, Matthias Minderer, Georg Heigold, Sylvain Gelly, Jakob Uszkoreit, and Neil Houlsby. An image is worth 16x16 words: Transformers for image recognition at scale. In *ICLR*, 2021. 6
- [4] Penghui Du, Yu Wang, Yifan Sun, Luting Wang, Yue Liao, Gang Zhang, Errui Ding, Yan Wang, Jingdong Wang, and Si Liu. Lami-detr: Open-vocabulary detection with language model instruction. In *ECCV*, 2024. 4, 5
- [5] Ruohuan Fang, Guansong Pang, and Xiao Bai. Simple image-level classification improves open-vocabulary object detection. In *AAAI*, 2024. 2
- [6] Chengjian Feng, Yujie Zhong, Zequn Jie, Xiangxiang Chu, Haibing Ren, Xiaolin Wei, Weidi Xie, and Lin Ma. Prompt-detr: Towards open-vocabulary detection using uncured images. In *ECCV*, 2022. 2
- [7] Junyao Gao, Yanchen Liu, Yanan Sun, Yinhao Tang, Yanhong Zeng, Kai Chen, and Cairong Zhao. Styleshot: A snapshot on any style. *arXiv:2407.01414*, 2024. 4, 7, 8, 5
- [8] Google LLC. Custom search JSON API reference. <https://developers.google.com/custom-search/v1>, 2024. Accessed: 2025-03-07. 6, 3
- [9] Lewis D. Griffin, Matthew Caldwell, and Jerone T. A. Andrews. COMPASS-XP. Zenodo, 2019. 3, 1
- [10] Laurynas Karazija, Iro Laina, Andrea Vedaldi, and Christian Rupprecht. Diffusion models for open-vocabulary segmentation. In *ECCV*, 2024. 5
- [11] Weicheng Kuo, Yin Cui, Xiuye Gu, AJ Piergiovanni, and Anelia Angelova. F-vm: Open-vocabulary object detection upon frozen vision and language models. *arXiv:2209.15639*, 2022. 2
- [12] Liangqi Li, Jiaxu Miao, Dahu Shi, Wenming Tan, Ye Ren, Yi Yang, and Shiliang Pu. Distilling detr with visual-linguistic knowledge for open-vocabulary object detection. In *ICCV*, 2023. 2
- [13] Liunian Harold Li, Pengchuan Zhang, Haotian Zhang, Jianwei Yang, Chunyuan Li, Yiwu Zhong, Lijuan Wang, Lu Yuan, Lei Zhang, Jenq-Neng Hwang, et al. Grounded language-image pre-training. In *CVPR*, 2022. 2, 7
- [14] Mingyuan Li, Tong Jia, Hao Wang, Bowen Ma, Hui Lu, Shuyang Lin, Da Cai, and Dongyue Chen. Ao-detr: Anti-overlapping detr for x-ray prohibited items detection. *IEEE Transactions on Neural Networks and Learning Systems*, 2024. 1
- [15] Chuang Lin, Peize Sun, Yi Jiang, Ping Luo, Lizhen Qu, Gholamreza Haffari, Zehuan Yuan, and Jianfei Cai. Learning object-language alignments for open-vocabulary object detection. In *ICLR*, 2023. 1, 2, 6, 7, 5
- [16] Shuyang Lin, Tong Jia, Hao Wang, Bowen Ma, Mingyuan Li, and Dongyue Chen. Detection of novel prohibited item categories for real-world security inspection. *Eng. Appl. Artif. Intell.*, 2025. 1, 2, 7
- [17] Tsung-Yi Lin, Michael Maire, Serge Belongie, James Hays, Pietro Perona, Deva Ramanan, Piotr Dollár, and C Lawrence Zitnick. Microsoft coco: Common objects in context. In *ECCV*, 2014. 6
- [18] Shilong Liu, Zhaoyang Zeng, Tianhe Ren, Feng Li, Hao Zhang, Jie Yang, Qing Jiang, Chunyuan Li, Jianwei Yang, Hang Su, Jun Zhu, and Lei Zhang. Grounding DINO: marrying DINO with grounded pre-training for open-set object detection. In *ECCV*, 2024. 1, 2, 6, 7, 8, 4, 5
- [19] Bowen Ma, Tong Jia, Min Su, Xiaodong Jia, Dongyue Chen, and Yichun Zhang. Automated segmentation of prohibited items in x-ray baggage images using dense de-overlap attention snake. *TMM*, 2022. 2, 3, 6, 7, 8, 4, 5
- [20] Bowen Ma, Tong Jia, Mingyuan Li, Songsheng Wu, Hao Wang, and Dongyue Chen. Towards dual-view x-ray baggage inspection: A large-scale benchmark and adaptive hierarchical cross refinement for prohibited item discovery. *IEEE TIFS*, 2024. 1, 3, 6, 7, 5
- [21] Chuofan Ma, Yi Jiang, Xin Wen, Zehuan Yuan, and Xiaojuan Qi. CoDet: Co-occurrence guided region-word alignment for open-vocabulary object detection. In *NeurIPS*, 2023. 2, 6, 7, 5
- [22] Caijing Miao, Lingxi Xie, Fang Wan, Chi Su, Hongye Liu, Jianbin Jiao, and Qixiang Ye. Sixray: A large-scale security inspection x-ray benchmark for prohibited item discovery in overlapping images. In *CVPR*, 2019. 2
- [23] Matthias Minderer, Alexey Gritsenko, Austin Stone, Maxim Neumann, Dirk Weissenborn, Alexey Dosovitskiy, Aravindh Mahendran, Anurag Arnab, Mostafa Dehghani, Zhuoran Shen, et al. Simple open-vocabulary object detection. In *ECCV*, 2022. 2
- [24] OpenAI. GPT-4 technical report. *CoRR*, abs/2303.08774, 2023. 6
- [25] Maxime Oquab, Timothée Darcet, Théo Moutakanni, Huy Vo, Marc Szafraniec, Vasil Khalidov, Pierre Fernandez, Daniel Haziza, Francisco Massa, Alaaeldin El-Nouby, et al. Dinov2: Learning robust visual features without supervision. *arXiv:2304.07193*, 2023. 6
- [26] Alec Radford, Jong Wook Kim, Chris Hallacy, Aditya Ramesh, Gabriel Goh, Sandhini Agarwal, Girish Sastry, Amanda Askell, Pamela Mishkin, Jack Clark, et al. Learning transferable visual models from natural language supervision. In *ICML*, 2021. 3
- [27] Nikhila Ravi, Valentin Gabeur, Yuan-Ting Hu, Ronghang Hu, Chaitanya Ryali, Tengyu Ma, Haitham Khedr, Roman Rädle, Chloe Rolland, Laura Gustafson, Eric Mintun, Junting Pan, Kalyan Vasudev Alwala, Nicolas Carion, Chao-Yuan Wu, Ross Girshick, Piotr Dollár, and Christoph Feichtenhofer. Sam 2: Segment anything in images and videos. *arXiv:2408.00714*, 2024. 6

- [28] Haifeng Sima, Bailiang Chen, Chaosheng Tang, Yudong Zhang, and Junding Sun. Multi-scale feature attention-detection transformer: Multi-scale feature attention for security check object detection. *IET Computer Vision*, 2024. [2](#)
- [29] Archana Singh and Dhiraj. Advancements in machine learning techniques for threat item detection in x-ray images: a comprehensive survey. *Int. J. Multim. Inf. Retr.*, 2024. [1](#)
- [30] Renshuai Tao, Yanlu Wei, Xiangjian Jiang, Hainan Li, Hao-tong Qin, Jiakai Wang, Yuqing Ma, Libo Zhang, and Xianglong Liu. Towards real-world x-ray security inspection: A high-quality benchmark and lateral inhibition module for prohibited items detection. In *ICCV*, 2021. [2](#), [3](#), [6](#), [7](#), [5](#)
- [31] Renshuai Tao, Hainan Li, Tianbo Wang, Yanlu Wei, Yifu Ding, Bowei Jin, Hongping Zhi, Xianglong Liu, and Aishan Liu. Exploring endogenous shift for cross-domain detection: A large-scale benchmark and perturbation suppression network. In *CVPR*, 2022. [2](#), [3](#)
- [32] Renshuai Tao, Tianbo Wang, Ziyang Wu, Cong Liu, Aishan Liu, and Xianglong Liu. Few-shot x-ray prohibited item detection: A benchmark and weak-feature enhancement network. In *ACMMM*, 2022. [1](#), [3](#)
- [33] Divya Velayudhan, Taimur Hassan, Ernesto Damiani, and Naoufel Werghi. Recent advances in baggage threat detection: A comprehensive and systematic survey. *ACM Computing Surveys*, 55(8):1–38, 2022. [2](#), [3](#)
- [34] Boying Wang, Libo Zhang, Longyin Wen, Xianglong Liu, and Yanjun Wu. Towards real-world prohibited item detection: A large-scale x-ray benchmark. In *ICCV*, 2021. [2](#), [3](#), [6](#), [7](#), [5](#)
- [35] Ruxue Wang, Yuliang Shi, and Mingyu Cai. Optimization and research of suspicious object detection algorithm in x-ray image. In *2023 IEEE 6th Information Technology, Networking, Electronic and Automation Control Conference (ITNEC)*, 2023. [2](#)
- [36] Yanlu Wei, Renshuai Tao, Zhangjie Wu, Yuqing Ma, Libo Zhang, and Xianglong Liu. Occluded prohibited items detection: An x-ray security inspection benchmark and de-occlusion attention module. In *ACMMM*, 2020. [2](#)
- [37] Size Wu, Wenwei Zhang, Sheng Jin, Wentao Liu, and Chen Change Loy. Aligning bag of regions for open-vocabulary object detection. In *CVPR*, 2023. [2](#), [7](#)
- [38] Size Wu, Wenwei Zhang, Lumin Xu, Sheng Jin, Xiangtai Li, Wentao Liu, and Chen Change Loy. Clipself: Vision transformer distills itself for open-vocabulary dense prediction. In *ICLR*, 2024. [2](#)
- [39] Xiaoshi Wu, Feng Zhu, Rui Zhao, and Hongsheng Li. Cora: Adapting clip for open-vocabulary detection with region prompting and anchor pre-matching. In *CVPR*, 2023. [2](#)
- [40] Lewei Yao, Jianhua Han, Youpeng Wen, Xiaodan Liang, Dan Xu, Wei Zhang, Zhenguo Li, Chunjing Xu, and Hang Xu. Detclip: Dictionary-enriched visual-concept paralleled pre-training for open-world detection. In *NeurIPS*, 2022. [2](#)
- [41] Lewei Yao, Jianhua Han, Xiaodan Liang, Dan Xu, Wei Zhang, Zhenguo Li, and Hang Xu. Detclipv2: Scalable open-vocabulary object detection pre-training via word-region alignment. In *CVPR*, 2023. [2](#)
- [42] Cairong Zhao, Liang Zhu, Shuguang Dou, Weihong Deng, and Liang Wang. Detecting overlapped objects in x-ray security imagery by a label-aware mechanism. *IEEE TIFS*, 2022. [2](#), [3](#), [6](#), [7](#), [5](#)
- [43] Yiwu Zhong, Jianwei Yang, Pengchuan Zhang, Chunyuan Li, Noel Codella, Liunian Harold Li, Luowei Zhou, Xiyang Dai, Lu Yuan, Yin Li, et al. Regionclip: Region-based language-image pretraining. In *CVPR*, 2022. [2](#)
- [44] Xingyi Zhou, Rohit Girdhar, Armand Joulin, Philipp Krähenbühl, and Ishan Misra. Detecting twenty-thousand classes using image-level supervision. In *ECCV*, 2022. [1](#), [2](#), [3](#), [6](#), [7](#), [5](#)
- [45] Chaoyang Zhu and Long Chen. A survey on open-vocabulary detection and segmentation: Past, present, and future. *IEEE TPAMI*, 2024. [3](#), [6](#)
